# Supplementary material
Source: PubMed Central journal article supplement (PMC11402781)
Supplement: 41594_2024_1299_MOESM1_ESM.pdf [file 41594_2024_1299_MOESM1_ESM.pdf]

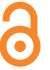

---

# Structural basis of TRPV1 modulation by endogenous bioactive lipids

---

In the format provided by the authors and unedited

## Table of Contents

### Figures

|                        |    |
|------------------------|----|
| Supplementary Figure 1 | 2  |
| Supplementary Figure 2 | 3  |
| Supplementary Figure 3 | 4  |
| Supplementary Figure 4 | 5  |
| Supplementary Figure 5 | 6  |
| Supplementary Figure 6 | 7  |
| Supplementary Figure 7 | 8  |
| Supplementary Figure 8 | 9  |
| Supplementary Figure 9 | 10 |

**a** Grid 1 (Empty 4°C)

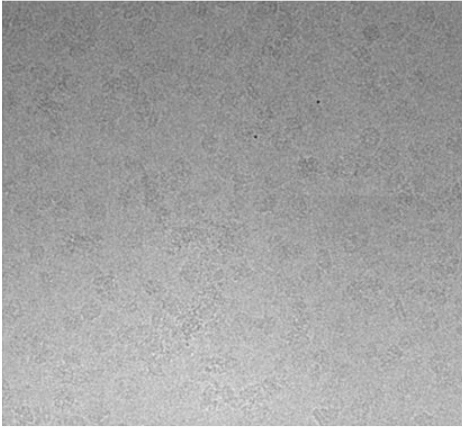

**b** Grid 2 (Empty 25°C)

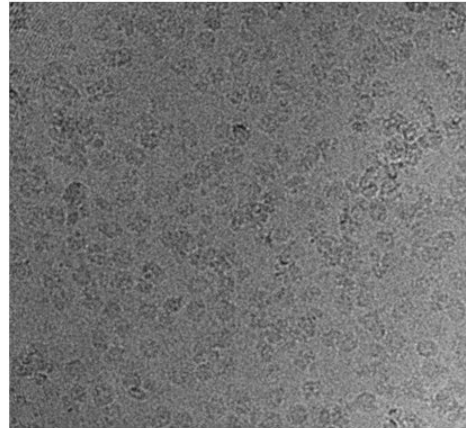

**c** Grid 3 (PI-Br<sub>4</sub>)

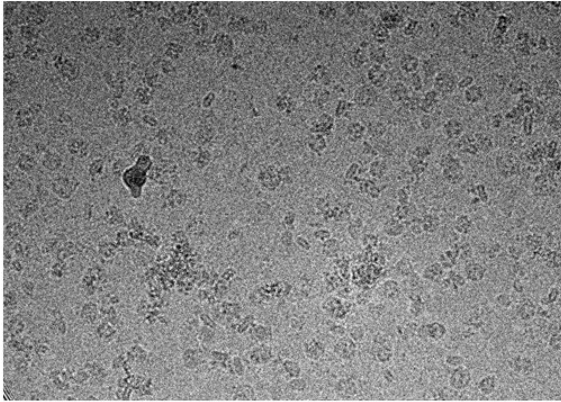

**d** Grid 4 (PIP<sub>2</sub>-Br<sub>4</sub>)

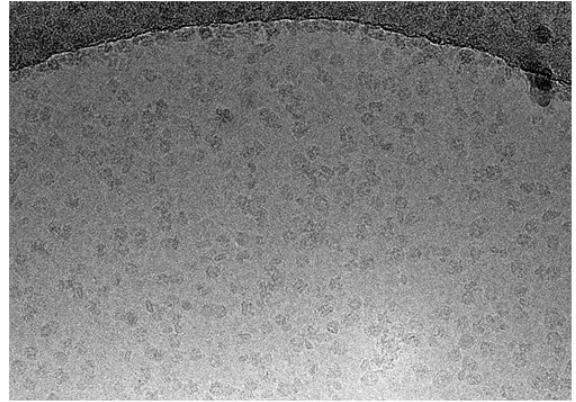

**e** Grid 5 (DiC8-PIP<sub>2</sub>)

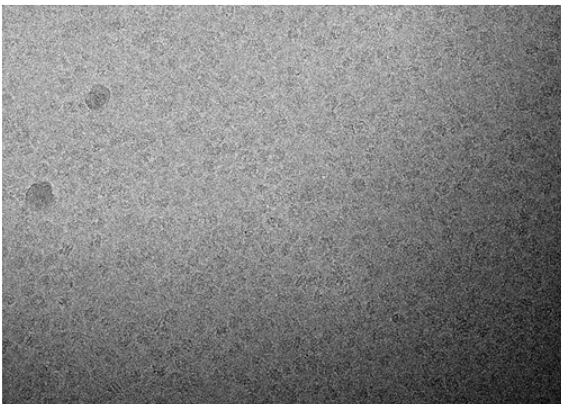

**f** Grid 6 (LPA)

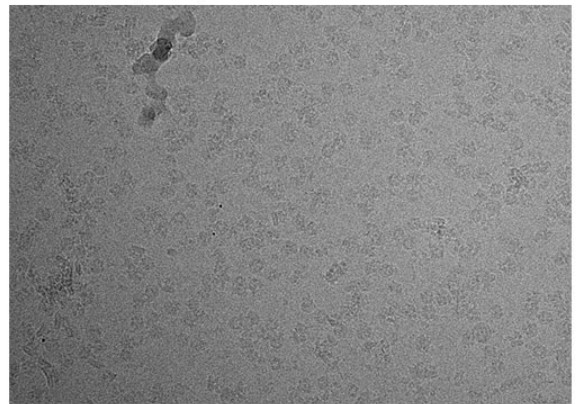

**Supplementary Figure 1.** Representative micrographs.

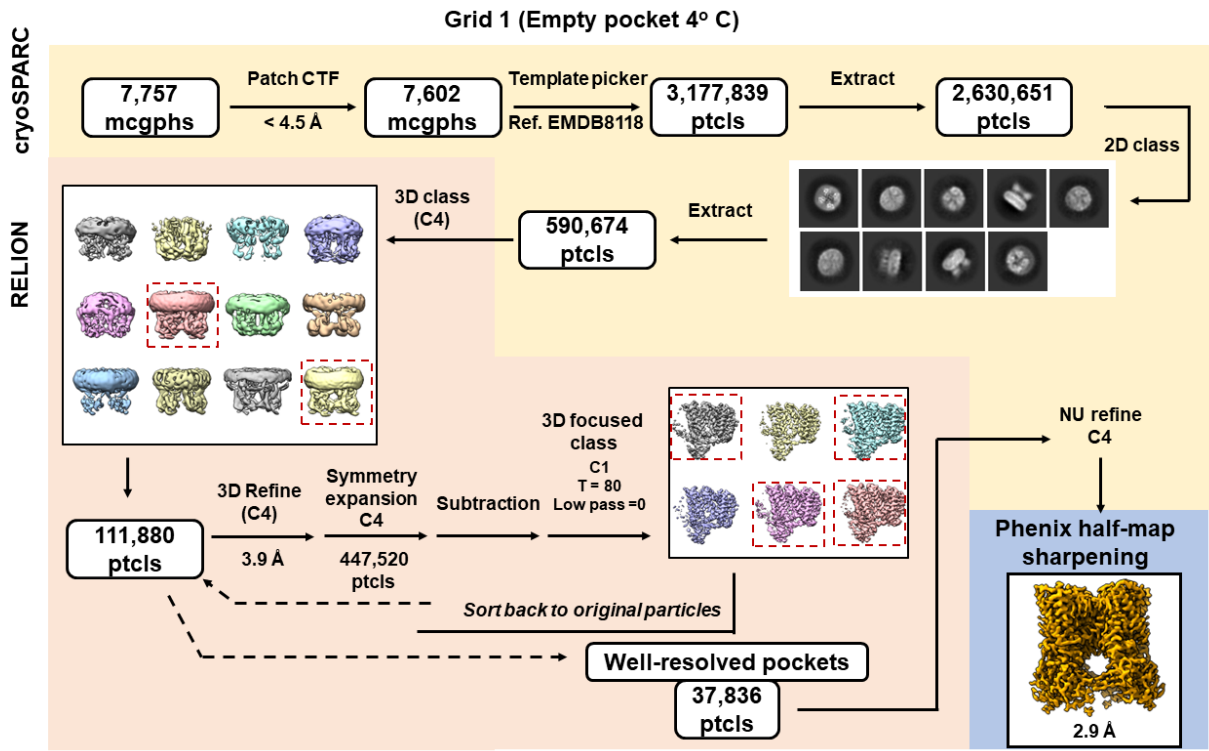

Supplementary Figure 2. Data processing scheme for Grid 1.

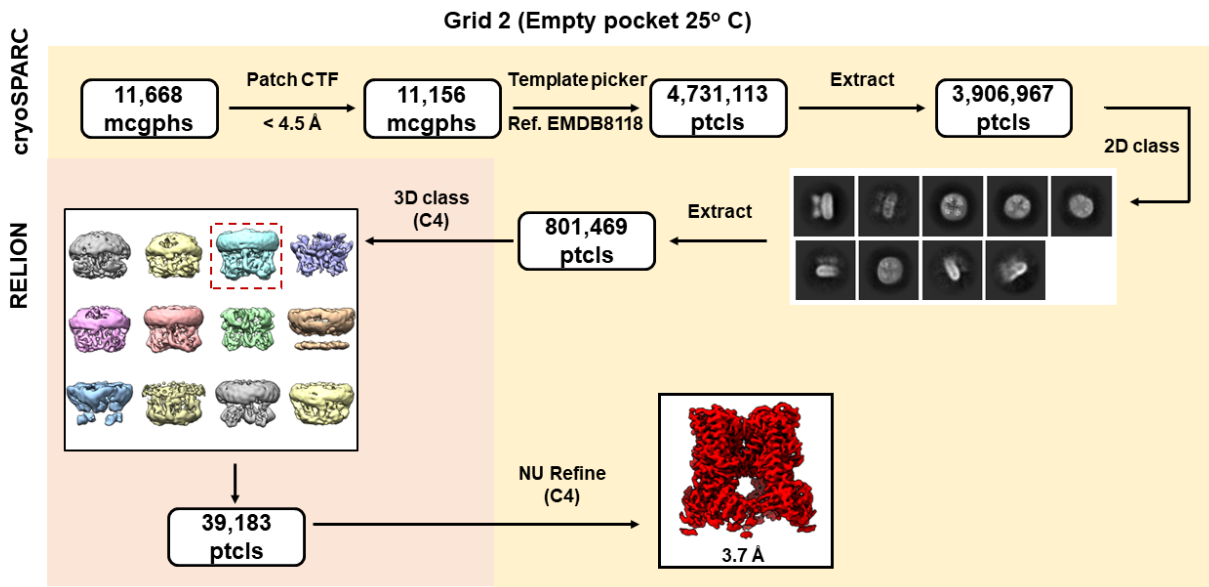

Supplementary Figure 3. Data processing scheme for Grid 2.

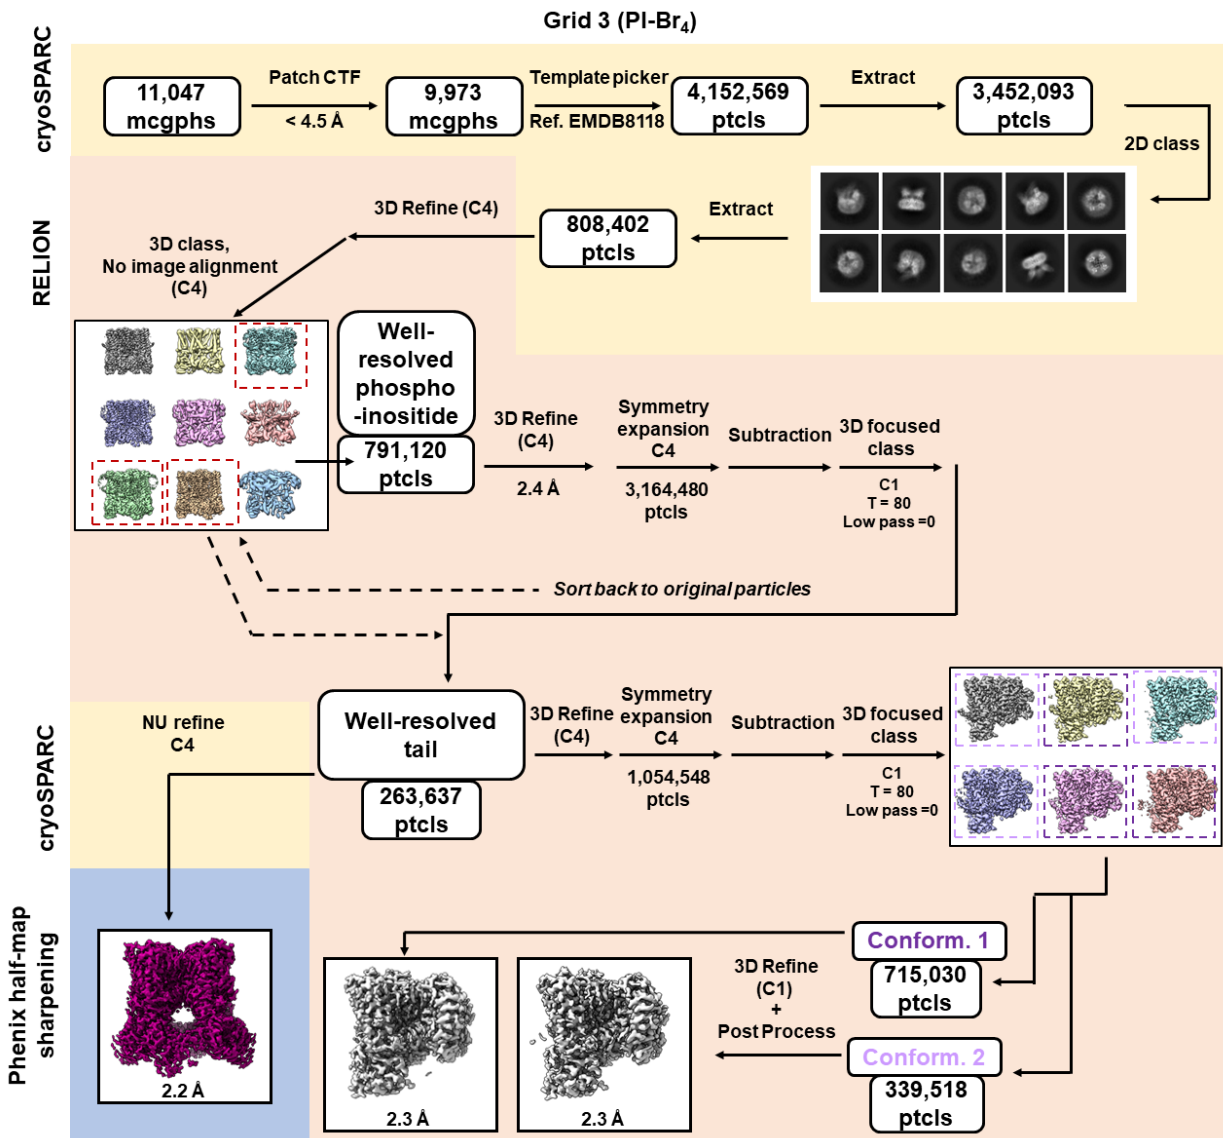

**Supplementary Figure 4.** Data processing scheme for Grid 3.

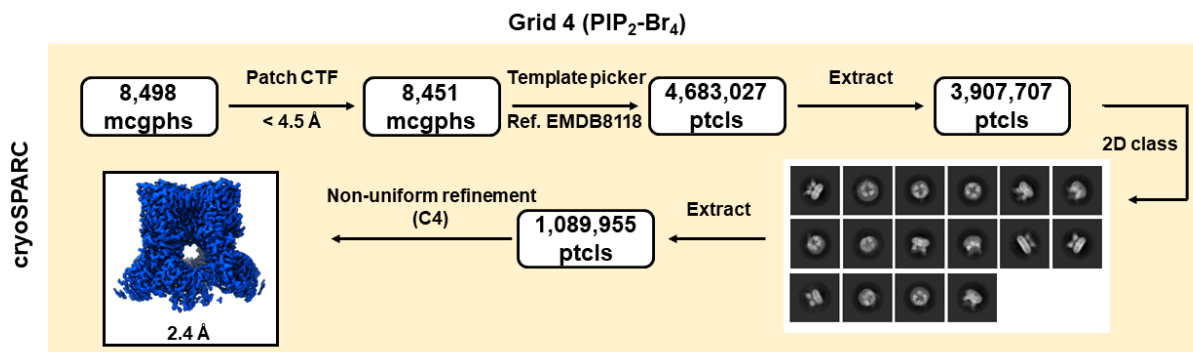

**Supplementary Figure 5.** Data processing scheme for Grid 4.

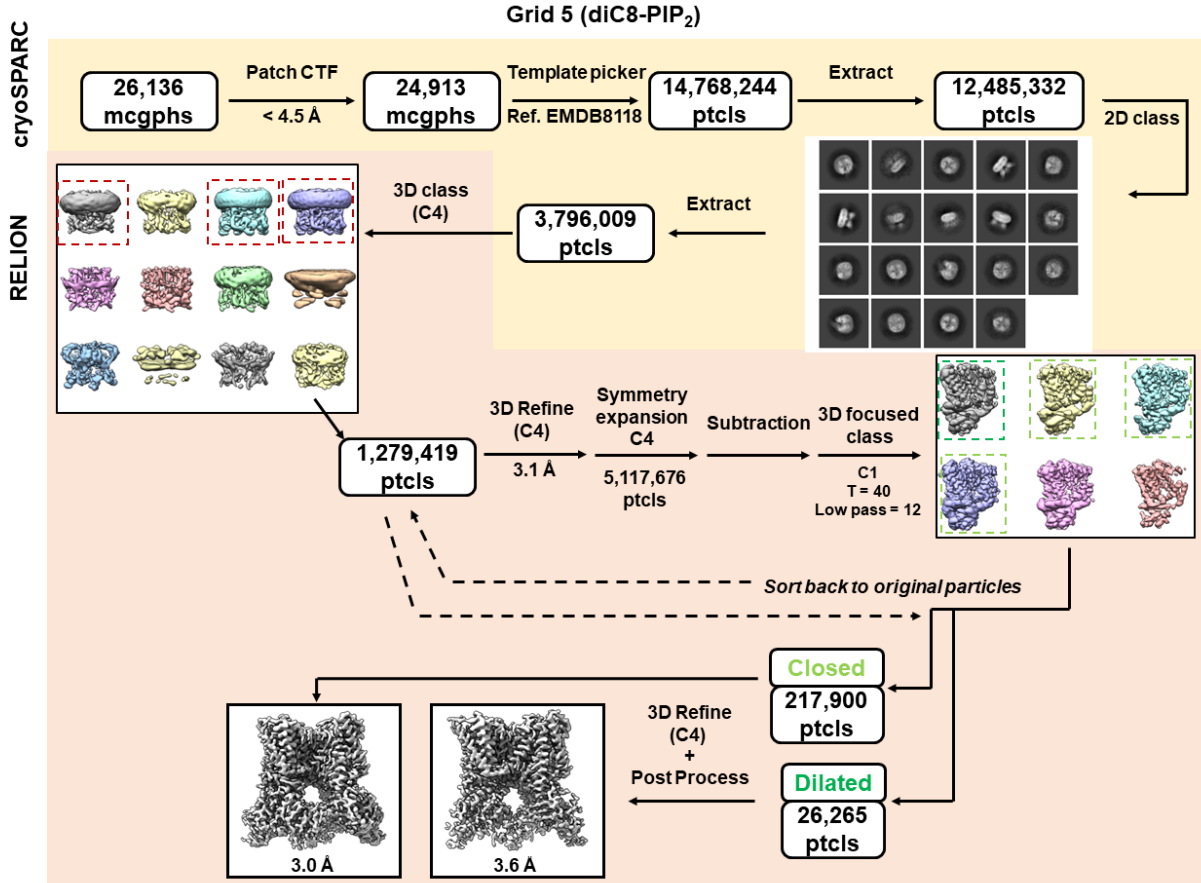

Supplementary Figure 6. Data processing scheme for Grid 5.



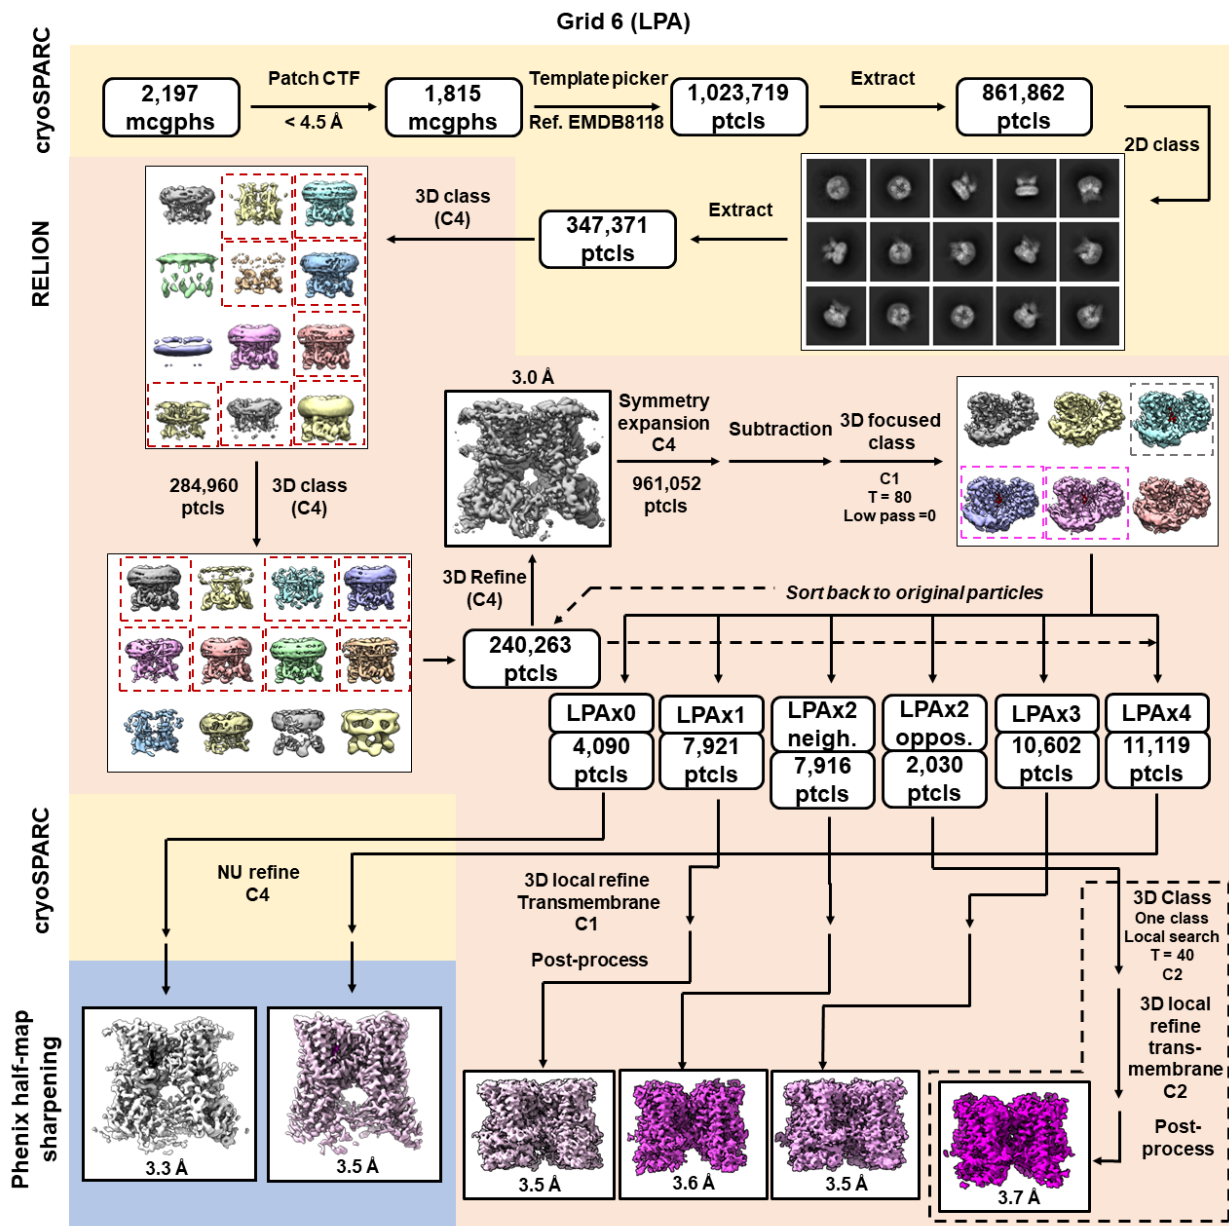

Supplementary Figure 7. Data processing scheme for Grid 6.

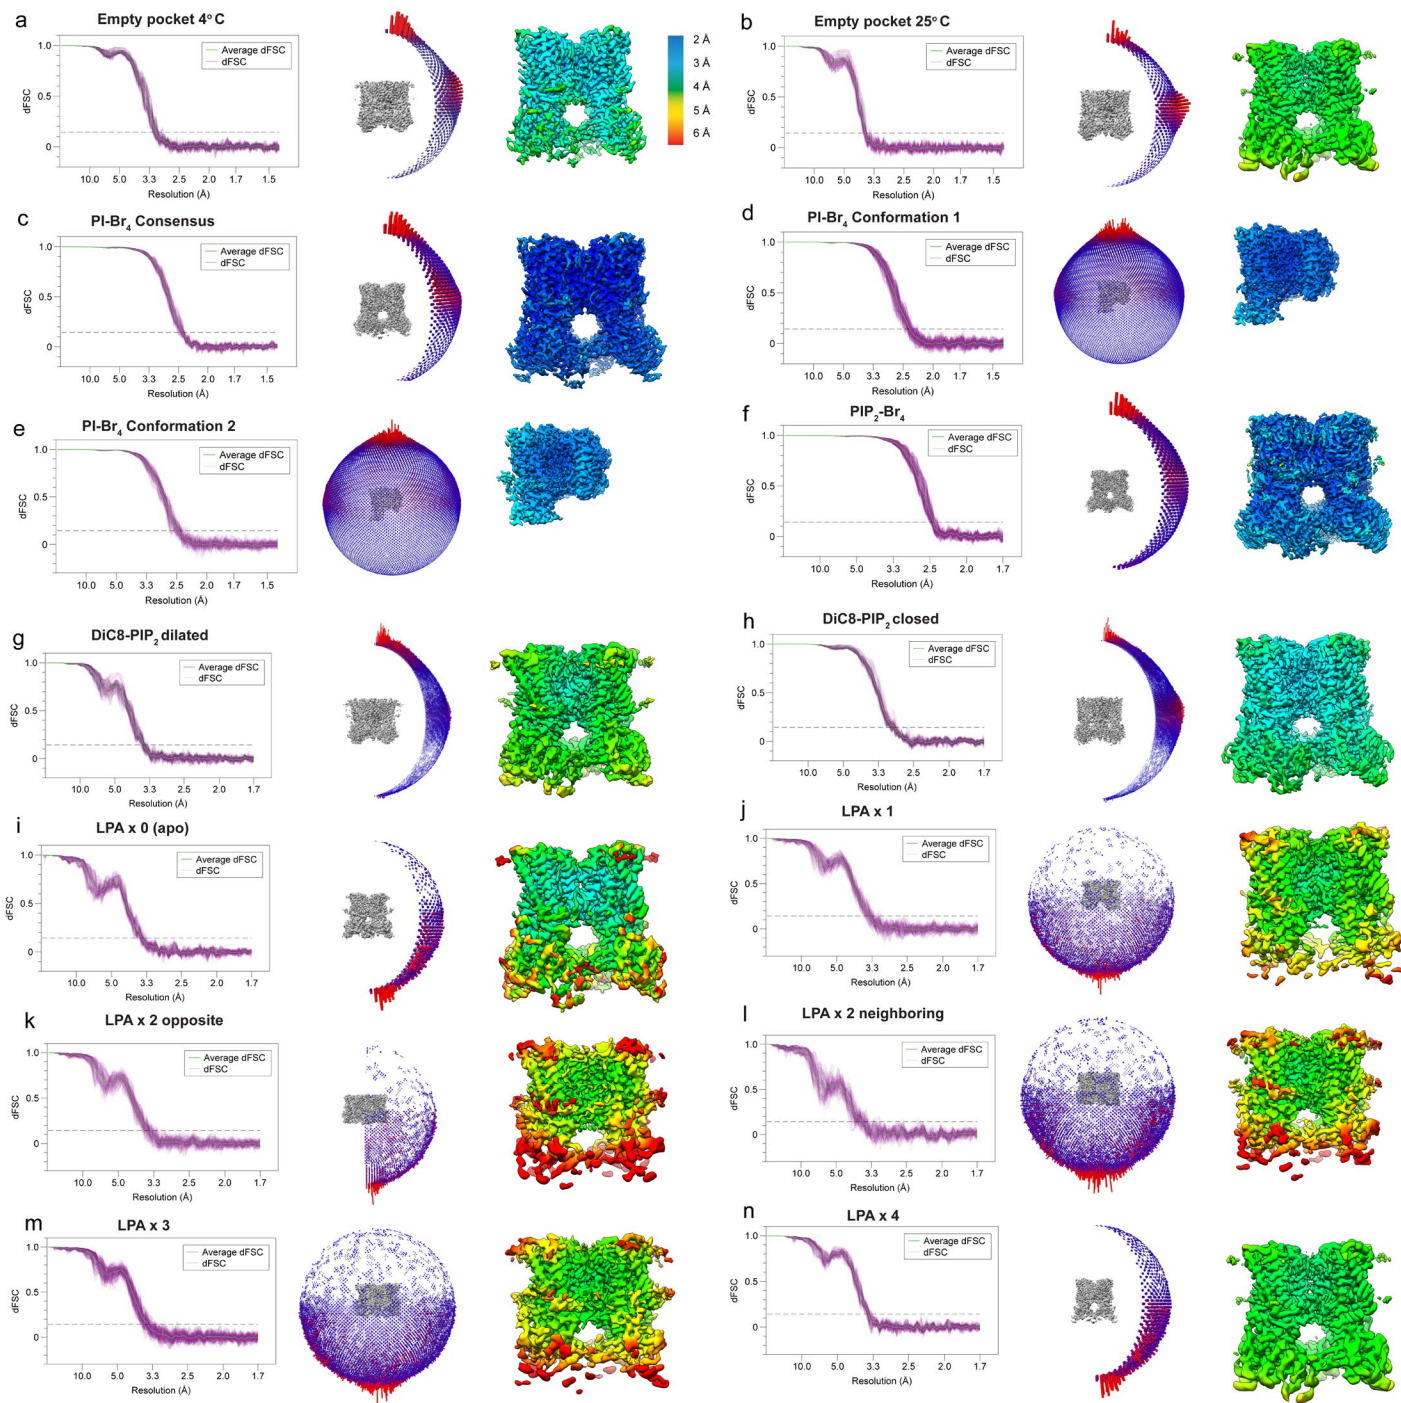

**Supplementary Figure 8.** (a-n) From left to right: plots of the dFSC curves, angular distribution plot, and local resolutions (colored according to key in (a)). For dFSC curves, gold standard FSC (0.143) is shown as a dashed line. Maps in d and e are from symmetry-expanded particles.

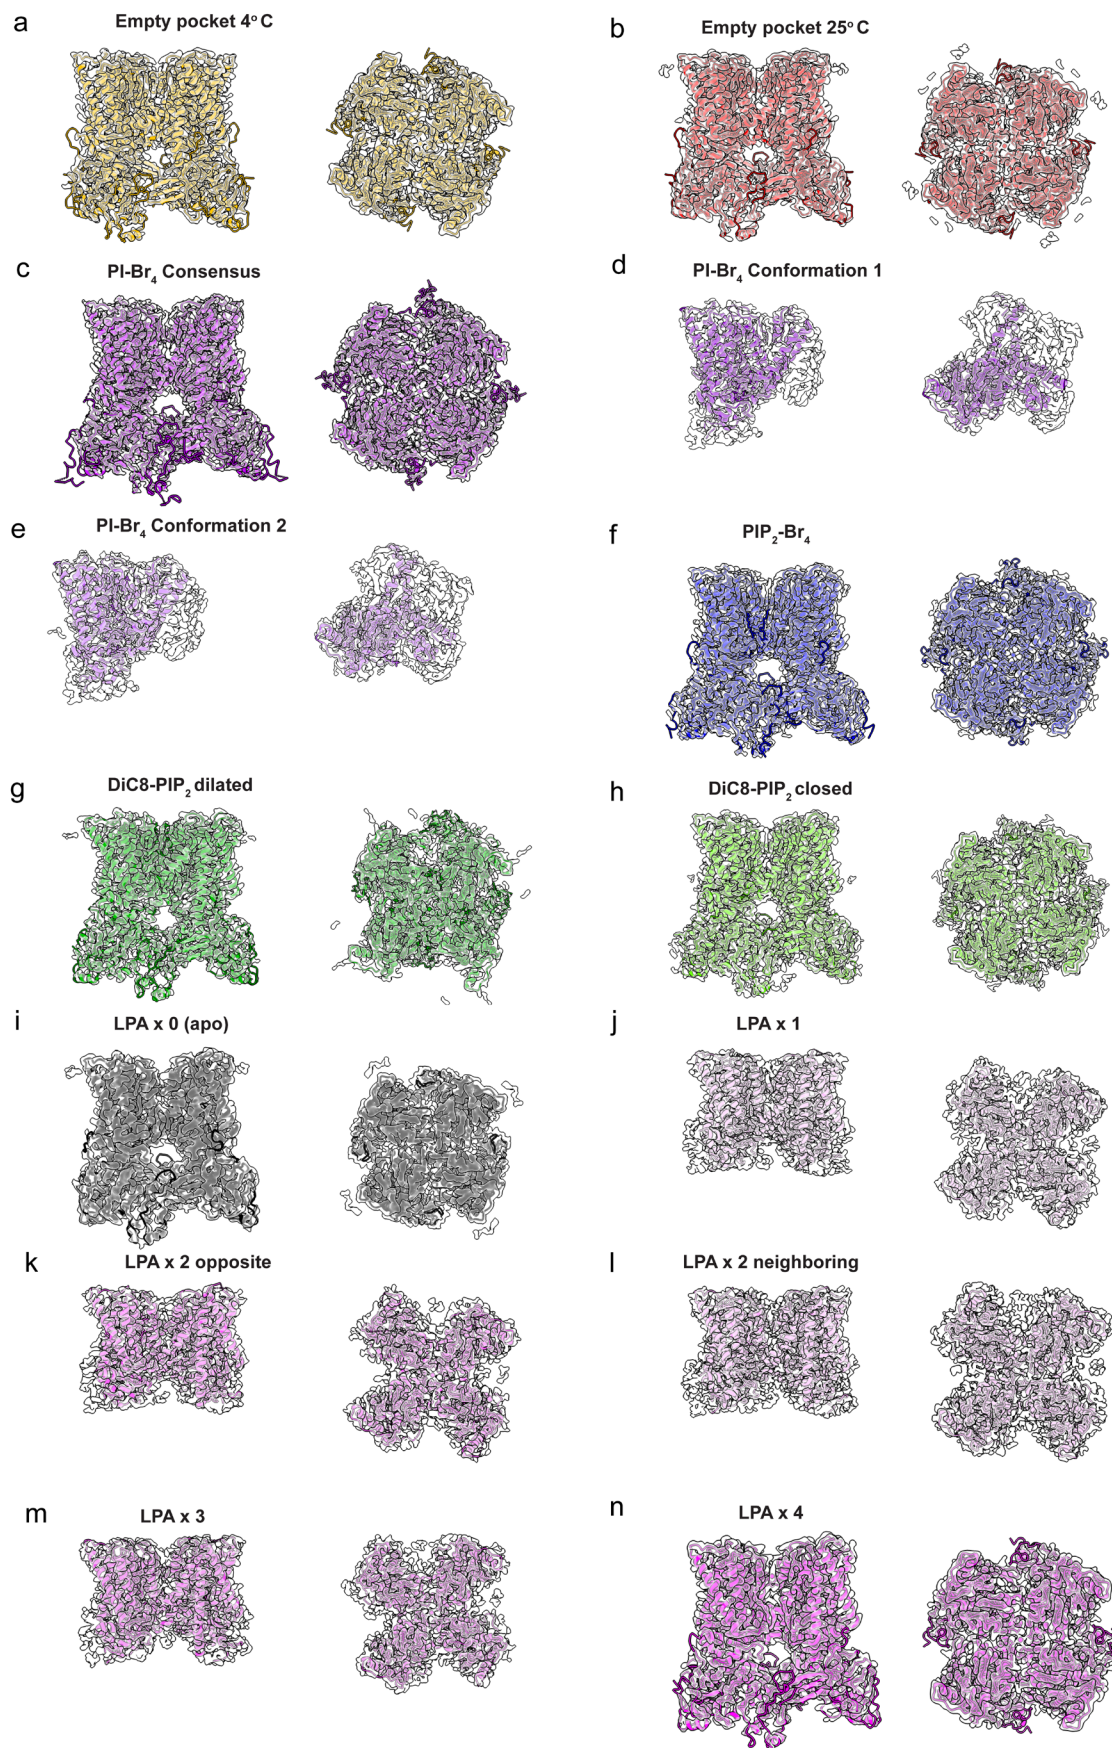

**Supplementary Figure 9.** (a-n) From left to right: Side and top views of all the models shown in their respective maps. Maps in d and e are from symmetry-expanded particles and models were built focusing on the binding site.
